# Supplementary material for: Development and validation of a prognostic nomogram for predicting poor outcomes following intravenous rt-PA in patients with acute ischemic stroke
Source: PeerJ. 2025 Feb 26;13:e18937. doi: 10.7717/peerj.18937 (PMC11871902; doi:10.7717/peerj.18937)
Supplement: Data S1 [file peerj-13-18937-s001.xlsx]

## Sheet: Sheet1
	Table 1 Basic characteristics of training set and verification set								Table 1 Statistical test of training set
	No	Factors	Training(n=275)	Validation(n=117	Overall(n=392)	Statistic	P		No	Factors	Group0	Group1	Overall	Statistic	P
	1	Gender				10.656	0.001			Gender				1.923	0.165
		Male	159(57.8)	88(75.2)	247(63.0)					Mal	129(60)	30(50)	159(57.8)
		Female	116(42.2)	29(24.8)	145(37.0)					Female	86(40)	30(50)	116(42.2)
		Ages	71.65±8.41	59.23±11.5	67.94±11.01	11.925	0			Ages	70.24±7.93	76.7±8.22	71.65±8.41	-5.53	<0.001
		Height								Height
		Weight								Weight
		BMI	24.51±2.95	25.4±3.43	24.77±3.13	-2.59	0.01			BMI	24.57±2.9	24.28±3.16	24.51±2.95	0.668	0.504
		OnsetTime	159.15±56.61	158.55±53.77	158.97±55.71	0.097	0.923			OnsetTime	161.44±55.35	150.92±60.68	159.15±56.61	1.275	0.203
		BNIHSS	7.17±5.72	6.48±4.65	6.96±5.43	1.15	0.251			BNIHSS	4.96±3.19	15.08±5.81	7.17±5.72	-17.745	<0.001
		Smoking				8.163	0.004			Smoking				2.15	0.143
		No	142(51.6)	42(35.9)	184(46.9)					No	106(49.3)	36(60)	142(51.6)
		Yes	133(48.4)	75(64.1)	208(53.1)					Yes	109(50.7)	24(40)	133(48.4)
		Hypertension				1.323	0.25			Hypertension				3.8	0.051
		No	78(28.4)	40(34.2)	118(30.1)					No	67(31.2)	11(18.3)	78(28.4)
		Yes	197(71.6)	77(65.8)	274(69.9)					Yes	148(68.8)	49(81.7)	197(71.6)
		preAF				5.158	0.023			preAF				14.105	<0.001
		No	221(80.4)	105(89.7)	326(83.2)					No	183(85.1)	38(63.3)	221(80.4)
		Yes	54(19.6)	12(10.3)	66(16.8)					Yes	32(14.9)	22(36.7)	54(19.6)
		preIHD				3.625	0.057			preIHD				1.066	0.302
		No	244(88.7)	111(94.9)	355(90.6)					No	193(89.8)	51(85)	244(88.7)
		Yes	31(11.3)	6(5.1)	37(9.4)					Yes	22(10.2)	9(15)	31(11.3)
		NewAF				1.708	0.191			NewAF				1.864	0.172
		No	268(97.5)	111(94.9)	379(96.7)					No	211(98.1)	57(95)	268(97.5)
		Yes	7(2.5)	6(5.1)	13(3.3)					Yes	4(1.9)	3(5)	7(2.5)
		DM				1.274	0.259			DM				1.255	0.263
		No	190(69.1)	74(63.2)	264(67.3)					No	145(67.4)	45(75)	190(69.1)
		Yes	85(30.9)	43(36.8)	128(32.7)					Yes	70(32.6)	15(25)	85(30.9)
		HL				3.935	0.047			HL				4.428	0.035
		No	195(70.9)	71(60.7)	266(67.9)					No	159(74)	36(60)	195(70.9)
		Yes	80(29.1)	46(39.3)	126(32.1)					Yes	56(26)	24(40)	80(29.1)
		CHD				11.834	0.001			CHD				2.135	0.144
		No	195(70.9)	102(87.2)	297(75.8)					No	157(73)	38(63.3)	195(70.9)
		Yes	80(29.1)	15(12.8)	95(24.2)					Yes	58(27)	22(36.7)	80(29.1)
		CHF				3.152	0.076			CHF				14.795	<0.001
		No	263(95.6)	116(99.1)	379(96.7)					No	211(98.1)	52(86.7)	263(95.6)
		Yes	12(4.4)	1(0.9)	13(3.3)					Yes	4(1.9)	8(13.3)	12(4.4)
		PreStrokeHistory				11.172	0.001			PreStrokeHistory				0.91	0.34
		No	212(77.1)	107(91.5)	319（81.4）					No	163(75.8)	49(81.7)	212(77.1)
		Yes	63(22.9)	10(8.5）	73（18.6）					Yes	52(24.2)	11(18.3)	63(22.9)
		CHDHistory				0.427	0.514			CHDHistory				3.596	0.058
		No	274(99.6)	117（100）	391（99.7）					No	215(100)	59(98.3)	274(99.6)
		Yes	1(0.4)	0（0）	1（0.3）					Yes	0(0)	1(1.7)	1(0.4)
		PreSBP	151.2±14.88	152.09±14.04	151.46±14.62	-0.556	0.579			PreSBP	150.16±14.8	154.9±14.72	151.2±14.88	-2.195	0.029
		PreDBP	82.77±10.31	87.12±10.22	84.07±10.46	-3.831	0			PreDBP	82.41±9.95	84.07±11.52	82.77±10.31	-1.101	0.272
		Hb	135.37±15.65	141.49±15.97	137.19±15.97	-3.521	0			Hb	135.38±15.55	135.33±16.16	135.37±15.65	0.019	0.985
		RBC	4.41±0.52	4.6±0.52	4.47±0.52	-3.367	0.001			RBC	4.4±0.51	4.44±0.56	4.41±0.52	-0.498	0.619
		WBC	6.95±2.31	7.09±2.5	6.99±2.37	-0.527	0.599			WBC	6.67±2.12	7.97±2.69	6.95±2.31	-3.957	<0.001
		N	66.5±10.45	64.69±10.39	65.96±10.45	1.571	0.117			N	64.48±9.36	73.74±11.02	66.5±10.45	-6.515	<0.001
		PLT	208.52±59.07	208.79±61.71	208.6±59.79	-0.04	0.968			PLT	207.51±57.59	212.13±64.48	208.52±59.07	-0.535	0.593
		K	3.9±0.38	3.92±0.36	3.91±0.37	-0.481	0.631			K	3.92±0.38	3.82±0.39	3.9±0.38	1.811	0.071
		Na	141.57±3.2	141.89±2.73	141.67±3.06	-0.929	0.354			Na	141.83±2.92	140.64±3.92	141.57±3.2	2.593	0.01
		UN	5.53±1.83	5.14±1.32	5.42±1.7	2.087	0.038			UN	5.41±1.68	5.99±2.24	5.53±1.83	-2.193	0.029
		Cr	75.54±23.55	72.72±17	74.7±21.82	1.169	0.243			Cr	75.7±23.29	74.95±24.67	75.54±23.55	0.218	0.827
		PT	13.01±0.82	12.67±0.76	12.91±0.81	3.828	0			PT	12.97±0.82	13.15±0.78	13.01±0.82	-1.528	0.128
		APTT	35.27±3.43	34.51±3.34	35.04±3.41	2.039	0.042			APTT	35.41±3.5	34.79±3.13	35.27±3.43	1.236	0.218
		INR	1±0.08	0.98±0.07	0.99±0.08	2.467	0.014			INR	0.99±0.08	1.01±0.08	1±0.08	-1.127	0.261
		Fg	3.08±0.97	2.92±0.73	3.04±0.91	1.605	0.109			Fg	2.96±0.77	3.54±1.39	3.08±0.97	-4.284	<0.001
		Complication				2.121	0.145			Complication				4.18	0.041
		No	255(92.7)	113（96.6）	368（93.9）					No	203(94.4)	52(86.7)	255(92.7)
		Yes	20(7.3)	4（3.4）	24（6.1）					Yes	12(5.6)	8(13.3)	20(7.3)
		InfarctionSite				3.021	0.221			InfarctionSite				11.308	0.004
		1	195(70.9)	81（69.2）	276（70.4）					1	143(66.5)	52(86.7)	195(70.9)
		2	74(26.9)	36（30.8）	110（28.1）					2	68(31.6)	6(10)	74(26.9)
		3	6(2.2)	0（0）	6（1.5）					3	4(1.9)	2(3.3)	6(2.2)
		X24hNIHSS	5.45±5.83	4.47±4.45	5.16±5.47	1.628	0.104			X24hNIHSS	2.83±2.09	14.85±5.22	5.46±5.84	-27.003	＜0.001
		X3mMRS				9.804	0.133			X3mMRS
		0	131(47.6)	66（56.4）	197（50.3）
		1	60(21.8)	18（15.4）	78（19.9）
		2	24(8.7)	16（13.7）	40（10.2）
		3	29(10.5）	12（10.3）	41（10.5）
		4	14(5.1)	3（2.6）	17（4.3）
		5	4(1.5)	0（0）	4（1）
		6	13(4.7)	2（1.7）	15（3.8）
		Group				2.762	0.097
		0	215(78.2)	100（85.5）	315（80.4）
		1	60(21.8)	17（14.5）	77（19.6）

## Sheet: Sheet3
		Groupstatistics													Descriptive statistics
			Dataset	Number of cases	Mean	Standard deviation	Mean standard error									N	Mean	Standard deviation			Crosstab
		Ages	1	275	71.65	8.413	0.507		71.65±8.41	59.23±11.5					Ages	392	67.94	11.009						Group		Total
			2	117	59.23	11.495	1.063								BMI	392	24.7741	3.12506						0	1
		BMI	1	275	24.5095	2.95377	0.178119		24.51±2.95	25.4±3.43					OnsetTime	392	158.97	55.71			Gender	1	Count	129	30	159
			2	117	25.3963	3.42829	0.316946								BNIHSS	392	6.96	5.428					Percentage for gender	0.811	0.189	1
		OnsetTime	1	275	159.15	56.61	3.414		159.15±56.61	158.55±53.77					PreSBP	392	151.46	14.624					Percentage for Group	0.6	0.5	0.578		129(60)	30(50)	159(57.8)
			2	117	158.55	53.772	4.971								PreDBP	392	84.07	10.463					Percentage of Total	0.469	0.109	0.578
		BNIHSS	1	275	7.17	5.724	0.345		7.17±5.72	6.48±4.65					Hb	392	137.19	15.974				2	Count	86	30	116
			2	117	6.48	4.645	0.429								RBC	392	4.4665	0.52372					Percentage for gender	0.741	0.259	1
		PreSBP	1	275	151.2	14.884	0.898		151.2±14.88	152.09±14.04					WBC	392	6.9941	2.36737					Percentage for Group	0.4	0.5	0.422		86(40)	30(50)	116(42.2)
			2	117	152.09	14.037	1.298								N	392	65.957	10.4518					Percentage of Total	0.313	0.109	0.422
		PreDBP	1	275	82.77	10.314	0.622		82.77±10.31	87.12±10.22					PLT	392	208.6	59.788			Total		Count	215	60	275
			2	117	87.12	10.216	0.944								K	392	3.908	0.37322					Percentage for gender	0.782	0.218	1
		Hb	1	275	135.37	15.652	0.944		135.37±15.65	141.49±15.97					Na	392	141.667	3.0637					Percentage for Group	1	1	1
			2	117	141.49	15.967	1.476								UN	392	5.4181	1.70046					Percentage of Total	0.782	0.218	1
		RBC	1	275	4.4092	0.51581	0.0311		4.41±0.52	4.6±0.52					Cr	392	74.698	21.8198
			2	117	4.6013	0.51956	0.04803								PT	392	12.9053	0.81359
		WBC	1	275	6.953	2.31168	0.1394		6.95±2.31	7.09±2.5					APTT	392	35.043	3.4139			Chi-square test
			2	117	7.0908	2.50096	0.23121								INR	392	0.9902	0.0766				Value	Degree of freedom	Asymptotic significance (two-tailed)	Exact significance (two-tailed)	Exact significance (one-tailed)
		N	1	275	66.497	10.4518	0.6303		66.5±10.45	64.69±10.39					Fg	392	3.036	0.90633			Pearson's chi-squared test	1.923a	1	0.165
			2	117	64.688	10.3858	0.9602								24hNIHSS	392	5.16	5.468			Continuity correction b	1.535	1	0.215
		PLT	1	275	208.52	59.068	3.562		208.52±59.07	208.79±61.71					Number of valid cases (column)	392					Likelihood ratio	1.907	1	0.167
			2	117	208.79	61.707	5.705														Fisher exact test				0.185	0.108
		K	1	275	3.902	0.37989	0.02291		3.9±0.38	3.92±0.36											Linear association	1.916	1	0.166
			2	117	3.9219	0.35826	0.03312														Number of valid cases	275
		Na	1	275	141.573	3.1961	0.1927		141.57±3.2	141.89±2.73
			2	117	141.887	2.7275	0.2522
		UN	1	275	5.5345	1.82842	0.11026		5.53±1.83	5.14±1.32											Crosstab
			2	117	5.1445	1.31994	0.12203																	Group		Total
		Cr	1	275	75.538	23.5507	1.4202		75.54±23.55	72.72±17														0	1
			2	117	72.723	17.0028	1.5719														Smoking	0	Count	106	36	142
		PT	1	275	13.0062	0.81684	0.04926		13.01±0.82	12.67±0.76													Percentage of Smoking	0.746	0.254	1
			2	117	12.6683	0.75787	0.07007																Percentage for Group	0.493	0.6	0.516		106(49.3)	36(60)	142(51.6)
		APTT	1	275	35.271	3.4266	0.2066		35.27±3.43	34.51±3.34													Percentage of Total	0.385	0.131	0.516
			2	117	34.506	3.337	0.3085															1	Count	109	24	133
		INR	1	275	0.9964	0.07752	0.00467		1±0.08	0.98±0.07													Percentage of Smoking	0.82	0.18	1
			2	117	0.9756	0.07268	0.00672																Percentage for Group	0.507	0.4	0.484		109(50.7)	24(40)	133(48.4)
		Fg	1	275	3.0838	0.9703	0.05851		3.08±0.97	2.92±0.73													Percentage of Total	0.396	0.087	0.484
			2	117	2.9236	0.72577	0.0671														Total		Count	215	60	275
	Independent sample test																						Percentage of Smoking	0.782	0.218	1
			Levene’s test for variance equality		t test for mean equivalence																		Percentage for Group	1	1	1
			F	Significance	t	Degree of freedom	Sig.（two-tailed）	Mean difference	Standard error difference	95% confidence interval of difference													Percentage of Total	0.782	0.218	1
										Lower limit	Upper limit
	Ages	Assumption of equal variances	7.445	0.007	11.925	390	0	12.42	1.042	10.372	14.468										Chi-square test
		No assumption of equal variances			10.547	171.133	0	12.42	1.178	10.096	14.745											Value	Degree of freedom	Asymptotic significance (two-tailed)	Exact significance (two-tailed)	Exact significance (one-tailed)
	BMI	Assumption of equal variances	0.929	0.336	-2.59	390	0.01	-0.886813	0.342449	-1.56009	-0.213536										Pearson's chi-squared test	2.150a	1	0.143
		No assumption of equal variances			-2.439	192.705	0.016	-0.886813	0.363567	-1.60389	-0.169731										Continuity correction b	1.743	1	0.187
	OnsetTime	Assumption of equal variances	0.111	0.739	0.097	390	0.923	0.598	6.157	-11.507	12.703										Likelihood ratio	2.164	1	0.141
		No assumption of equal variances			0.099	229.58	0.921	0.598	6.03	-11.284	12.481										Fisher exact test				0.148	0.093
	BNIHSS	Assumption of equal variances	2.729	0.099	1.15	390	0.251	0.689	0.599	-0.489	1.866										Linear association	2.142	1	0.143
		No assumption of equal variances			1.25	267.101	0.212	0.689	0.551	-0.396	1.773
	PreSBP	Assumption of equal variances	0.912	0.34	-0.556	390	0.579	-0.898	1.616	-4.074	2.279
		No assumption of equal variances			-0.569	231.137	0.57	-0.898	1.578	-4.006	2.211										Crosstab
	PreDBP	Assumption of equal variances	0.412	0.521	-3.831	390	0	-4.349	1.135	-6.581	-2.117													Group		Total
		No assumption of equal variances			-3.846	220.845	0	-4.349	1.131	-6.577	-2.12													0	1
	Hb	Assumption of equal variances	0.019	0.89	-3.521	390	0	-6.12	1.738	-9.537	-2.703										Hypertension	0	Count	67	11	78
		No assumption of equal variances			-3.493	215.021	0.001	-6.12	1.752	-9.573	-2.666												Percentage of Hypertension	0.859	0.141	1
	RBC	Assumption of equal variances	0.553	0.458	-3.367	390	0.001	-0.19212	0.05706	-0.3043	-0.07994												Percentage for Group	0.312	0.183	0.284		67(31.2)	11(18.3)	78(28.4)
		No assumption of equal variances			-3.357	217.493	0.001	-0.19212	0.05722	-0.3049	-0.07933												Percentage of Total	0.244	0.04	0.284
	WBC	Assumption of equal variances	0.024	0.878	-0.527	390	0.599	-0.13779	0.26155	-0.65201	0.37643											1	Count	148	49	197
		No assumption of equal variances			-0.51	204.232	0.61	-0.13779	0.26999	-0.6701	0.39453												Percentage of Hypertension	0.751	0.249	1
	N	Assumption of equal variances	0.463	0.496	1.571	390	0.117	1.8091	1.1515	-0.4549	4.073												Percentage for Group	0.688	0.817	0.716		148(68.8)	49(81.7)	197(71.6)
		No assumption of equal variances			1.575	220.194	0.117	1.8091	1.1485	-0.4545	4.0726												Percentage of Total	0.538	0.178	0.716
	PLT	Assumption of equal variances	0.205	0.651	-0.04	390	0.968	-0.266	6.608	-13.258	12.725										Total		Count	215	60	275
		No assumption of equal variances			-0.04	210.526	0.968	-0.266	6.725	-13.524	12.992
	K	Assumption of equal variances	0.617	0.433	-0.481	390	0.631	-0.01984	0.04124	-0.10092	0.06123
		No assumption of equal variances			-0.493	231.137	0.623	-0.01984	0.04027	-0.09919	0.0595										Chi-square test
	Na	Assumption of equal variances	3.743	0.054	-0.929	390	0.354	-0.3141	0.3382	-0.9791	0.3509											Value	Degree of freedom	Asymptotic significance (two-tailed)	Exact significance (two-tailed)	Exact significance (one-tailed)
		No assumption of equal variances			-0.99	254.365	0.323	-0.3141	0.3174	-0.9391	0.3109										Pearson's chi-squared test	3.800a	1	0.051
	UN	Assumption of equal variances	5.097	0.025	2.087	390	0.038	0.38998	0.18689	0.02253	0.75742										Continuity correction b	3.195	1	0.074
		No assumption of equal variances			2.371	298.491	0.018	0.38998	0.16446	0.06633	0.71363										Likelihood ratio	4.055	1	0.044
	Cr	Assumption of equal variances	4.488	0.035	1.169	390	0.243	2.8151	2.4073	-1.9178	7.548										Fisher exact test				0.054	0.034
		No assumption of equal variances			1.329	298.467	0.185	2.8151	2.1184	-1.3539	6.9841										Linear association	3.786	1	0.052
	PT	Assumption of equal variances	0.628	0.428	3.828	390	0	0.33789	0.08828	0.16434	0.51145										Number of valid cases	275
		No assumption of equal variances			3.945	234.725	0	0.33789	0.08565	0.16916	0.50663										a 0 cells (0.0%) have an expected count less than 5. The minimum expected count is 17.02.
	APTT	Assumption of equal variances	0.296	0.587	2.039	390	0.042	0.7653	0.3753	0.0274	1.5032										b calculated for 2x2 tables only
		No assumption of equal variances			2.061	224.311	0.04	0.7653	0.3713	0.0336	1.497
	INR	Assumption of equal variances	0.22	0.639	2.467	390	0.014	0.02072	0.0084	0.00421	0.03724
		No assumption of equal variances			2.532	232.415	0.012	0.02072	0.00818	0.0046	0.03685										Crosstab
	Fg	Assumption of equal variances	4.361	0.037	1.605	390	0.109	0.16023	0.09984	-0.03606	0.35652													Group		Total
		No assumption of equal variances			1.8	288.802	0.073	0.16023	0.08903	-0.01499	0.33545													0	1
																					preAF	0	Count	183	38	221
																							Percentage of preAF	0.828	0.172	1
		Crosstab																					Percentage for Group	0.851	0.633	0.804		183(85.1)	38(63.3)	221(80.4)
					Dataset		Total																Percentage of Total	0.665	0.138	0.804
					1	2																1	Count	32	22	54
		Gender	1	Count	159	88	247																Percentage of preAF	0.593	0.407	1
				Percentage for gender	0.644	0.356	1																Percentage for Group	0.149	0.367	0.196		32(14.9)	22(36.7)	54(19.6)
				Percentage of Dataset	0.578	0.752	0.63		159(57.8)	88(75.2)	247(63)												Percentage of Total	0.116	0.08	0.196
				Percentage of Total	0.406	0.224	0.63														Total		Count	215	60	275
			2	Count	116	29	145																Percentage of preAF	0.782	0.218	1
				Percentage for gender	0.8	0.2	1																Percentage for Group	1	1	1
				Percentage of Dataset	0.422	0.248	0.37		116(42.2)	29(24.8)	145(37)												Percentage of Total	0.782	0.218	1
				Percentage of Total	0.296	0.074	0.37
		Total		Count	275	117	392
				Percentage for gender	0.702	0.298	1														Chi-square test
				Percentage of Dataset	1	1	1															Value	Degree of freedom	Asymptotic significance (two-tailed)	Exact significance (two-tailed)	Exact significance (one-tailed)
				Percentage of Total	0.702	0.298	1														Pearson's chi-squared test	14.105a	1	0
																					Continuity correction b	12.758	1	0
																					Likelihood ratio	12.672	1	0
																					Fisher exact test				0	0
		Chi-square test
			Value	Degree of freedom	Asymptotic significance (two-tailed)	Exact significance (two-tailed)	Exact significance (one-tailed)
		Pearson's chi-squared test	10.656a	1	0.001																Crosstab
		Continuity correction b	9.923	1	0.002																			Group		Total
		Likelihood ratio	11.065	1	0.001																			0	1
		Fisher exact test				0.001	0.001														preIHD	0	Count	193	51	244
		Linear association	10.629	1	0.001																		Percentage of preIHD	0.791	0.209	1
		Number of valid cases	392																				Percentage for Group	0.898	0.85	0.887		193(89.8)	51(85)	244(88.7)
		a 0 cells (0.0%) have an expected count less than 5. The minimum expected count is 43.28.																					Percentage of Total	0.702	0.185	0.887
		b calculated for 2x2 tables only																				1	Count	22	9	31
																							Percentage of preIHD	0.71	0.29	1
																							Percentage for Group	0.102	0.15	0.113		22(10.2)	9(15)	31(11.3)
																							Percentage of Total	0.08	0.033	0.113
		Crosstab
					Dataset		Total														Chi-square test
					1	2																Value	Degree of freedom	Asymptotic significance (two-tailed)	Exact significance (two-tailed)	Exact significance (one-tailed)
		Smoking	0	Count	142	42	184														Pearson's chi-squared test	1.066a	1	0.302
				Percentage of Smoking	0.772	0.228	1														Continuity correction b	0.643	1	0.423
				Percentage of Dataset	0.516	0.359	0.469		142(51.6)	42(35.9)	184(46.9)										Likelihood ratio	1.004	1	0.316
				Percentage of Total	0.362	0.107	0.469														Fisher exact test				0.355	0.208
			1	Count	133	75	208														Linear association	1.062	1	0.303
				Percentage of Smoking	0.639	0.361	1														Number of valid cases	275
				Percentage of Dataset	0.484	0.641	0.531		133(48.4)	75(64.1)	208(53.1)										a 0 cells (0.0%) have an expected count less than 5. The minimum expected count is 6.76.
				Percentage of Total	0.339	0.191	0.531
		Total		Count	275	117	392
				Percentage of Smoking	0.702	0.298	1
				Percentage of Dataset	1	1	1														Crosstab
																								Group		Total
		Chi-square test																						0	1
			Value	Degree of freedom	Asymptotic significance (two-tailed)	Exact significance (two-tailed)	Exact significance (one-tailed)														NewAF	0	Count	211	57	268
		Pearson's chi-squared test	8.163a	1	0.004																		Percentage of NewAF	0.787	0.213	1
		Continuity correction b	7.544	1	0.006																		Percentage for Group	0.981	0.95	0.975		211(98.1)	57(95)	268(97.5)
		Likelihood ratio	8.259	1	0.004																		Percentage of Total	0.767	0.207	0.975
		Fisher exact test				0.006	0.003															1	Count	4	3	7
		Linear association	8.143	1	0.004																		Percentage of NewAF	0.571	0.429	1
		Number of valid cases	392																				Percentage for Group	0.019	0.05	0.025		4(1.9)	3(5)	7(2.5)
		a 0 cells (0.0%) have an expected count less than 5. The minimum expected count is 54.92.																					Percentage of Total	0.015	0.011	0.025
		b calculated for 2x2 tables only																			Total		Count	215	60	275
		Crosstab																					Percentage of NewAF	0.782	0.218	1
					Dataset		Total																Percentage for Group	1	1	1
					1	2																	Percentage of Total	0.782	0.218	1
		Hypertension	0	Count	78	40	118
				Percentage of Hypertension	0.661	0.339	1
				Percentage of Dataset	0.284	0.342	0.301		78(28.4)	40(34.2)	118(30.1)										Chi-square test
				Percentage of Total	0.199	0.102	0.301															Value	Degree of freedom	Asymptotic significance (two-tailed)	Exact significance (two-tailed)	Exact significance (one-tailed)
			1	Count	197	77	274														Pearson's chi-squared test	1.864a	1	0.172
				Percentage of Hypertension	0.719	0.281	1														Continuity correction b	0.813	1	0.367
				Percentage of Dataset	0.716	0.658	0.699		197(71.6)	77(65.8)	274(69.9)										Likelihood ratio	1.591	1	0.207
				Percentage of Total	0.503	0.196	0.699														Fisher exact test				0.178	0.178
		Total		Count	275	117	392														Linear association	1.857	1	0.173
		Chi-square test
			Value	Degree of freedom	Asymptotic significance (two-tailed)	Exact significance (two-tailed)	Exact significance (one-tailed)
		Pearson's chi-squared test	1.323a	1	0.25																Crosstab
		Continuity correction b	1.061	1	0.303																			Group		Total
		Likelihood ratio	1.306	1	0.253																			0	1
		Fisher exact test				0.279	0.152														DM	0	Count	145	45	190
		Linear association	1.32	1	0.251																		Percentage of DM	0.763	0.237	1
		Number of valid cases	392																				Percentage for Group	0.674	0.75	0.691		145(67.4)	45(75)	190(69.1)
		a 0 cells (0.0%) have an expected count less than 5. The minimum expected count is 35.22.																					Percentage of Total	0.527	0.164	0.691
		b calculated for 2x2 tables only																				1	Count	70	15	85
		Crosstab																					Percentage of DM	0.824	0.176	1
					Dataset		Total																Percentage for Group	0.326	0.25	0.309		70(32.6)	15(25)	85(30.9)
					1	2																	Percentage of Total	0.255	0.055	0.309
		preAF	0	Count	221	105	326														Total		Count	215	60	275
				Percentage of preAF	0.678	0.322	1																Percentage of DM	0.782	0.218	1
				Percentage of Dataset	0.804	0.897	0.832		221(80.4)	105(89.7)	326(83.2)
				Percentage of Total	0.564	0.268	0.832														Chi-square test
			1	Count	54	12	66															Value	Degree of freedom	Asymptotic significance (two-tailed)	Exact significance (two-tailed)	Exact significance (one-tailed)
				Percentage of preAF	0.818	0.182	1														Pearson's chi-squared test	1.255a	1	0.263
				Percentage of Dataset	0.196	0.103	0.168		54(19.6)	12(10.3)	66(16.8)										Continuity correction b	0.926	1	0.336
				Percentage of Total	0.138	0.031	0.168														Likelihood ratio	1.292	1	0.256
		Total		Count	275	117	392														Fisher exact test				0.343	0.168
				Percentage of preAF	0.702	0.298	1														Linear association	1.25	1	0.264
				Percentage of Dataset	1	1	1														Number of valid cases	275
				Percentage of Total	0.702	0.298	1														a 0 cells (0.0%) have an expected count less than 5. The minimum expected count is 18.55.
		Chi-square test																			Crosstab
			Value	Degree of freedom	Asymptotic significance (two-tailed)	Exact significance (two-tailed)	Exact significance (one-tailed)																	Group		Total
		Pearson's chi-squared test	5.158a	1	0.023																			0	1
		Continuity correction b	4.509	1	0.034																HL	0	Count	159	36	195
		Likelihood ratio	5.573	1	0.018																		Percentage of HL	0.815	0.185	1
		Fisher exact test				0.026	0.014																Percentage for Group	0.74	0.6	0.709		159(74)	36(60)	195(70.9)
		Linear association	5.144	1	0.023																		Percentage of Total	0.578	0.131	0.709
		Number of valid cases	392																			1	Count	56	24	80
		a 0 cells (0.0%) have an expected count less than 5. The minimum expected count is 19.70.																					Percentage of HL	0.7	0.3	1
		b calculated for 2x2 tables only																					Percentage for Group	0.26	0.4	0.291		56(26)	24(40)	80(29.1)
		Crosstab																					Percentage of Total	0.204	0.087	0.291
					Dataset		Total														Total		Count	215	60	275
					1	2																	Percentage of HL	0.782	0.218	1
		preIHD	0	Count	244	111	355
				Percentage of preIHD	0.687	0.313	1														Chi-square test
				Percentage of Dataset	0.887	0.949	0.906		244(88.7)	111(94.9)	355(90.6)											Value	Degree of freedom	Asymptotic significance (two-tailed)	Exact significance (two-tailed)	Exact significance (one-tailed)
				Percentage of Total	0.622	0.283	0.906														Pearson's chi-squared test	4.428a	1	0.035
			1	Count	31	6	37														Continuity correction b	3.777	1	0.052
				Percentage of preIHD	0.838	0.162	1														Likelihood ratio	4.245	1	0.039
				Percentage of Dataset	0.113	0.051	0.094		31(11.3)	6(5.1)	37(9.4)										Fisher exact test				0.053	0.028
				Percentage of Total	0.079	0.015	0.094														Linear association	4.411	1	0.036
		Total		Count	275	117	392														Number of valid cases	275
				Percentage of preIHD	0.702	0.298	1														a 0 cells (0.0%) have an expected count less than 5. The minimum expected count is 17.45.
				Percentage of Dataset	1	1	1														b calculated for 2x2 tables only
				Percentage of Total	0.702	0.298	1
																					Crosstab
																								Group		Total
																								0	1
		Chi-square test																			CHD	0	Count	157	38	195
			Value	Degree of freedom	Asymptotic significance (two-tailed)	Exact significance (two-tailed)	Exact significance (one-tailed)																Percentage of CHD	0.805	0.195	1
		Pearson's chi-squared test	3.625a	1	0.057																		Percentage for Group	0.73	0.633	0.709		157(73)	38(63.3)	195(70.9)
		Continuity correction b	2.942	1	0.086																		Percentage of Total	0.571	0.138	0.709
		Likelihood ratio	4.027	1	0.045																	1	Count	58	22	80
		Fisher exact test				0.061	0.038																Percentage of CHD	0.725	0.275	1
		Linear association	3.616	1	0.057																		Percentage for Group	0.27	0.367	0.291		58(27)	22(36.7)	80(29.1)
		Number of valid cases	392																				Percentage of Total	0.211	0.08	0.291
		a 0 cells (0.0%) have an expected count less than 5. The minimum expected count is 11.04.																			Total		Count	215	60	275
		b calculated for 2x2 tables only																					Percentage of CHD	0.782	0.218	1
		Crosstab
					Dataset		Total														Chi-square test
					1	2																Value	Degree of freedom	Asymptotic significance (two-tailed)	Exact significance (two-tailed)	Exact significance (one-tailed)
		NewAF	0	Count	268	111	379														Pearson's chi-squared test	2.135a	1	0.144
				Percentage of NewAF	0.707	0.293	1														Continuity correction b	1.691	1	0.193
				Percentage of Dataset	0.975	0.949	0.967		268(97.5)	111(94.9)	379(96.7)										Likelihood ratio	2.069	1	0.15
				Percentage of Total	0.684	0.283	0.967														Fisher exact test				0.151	0.098
			1	Count	7	6	13														Linear association	2.127	1	0.145
				Percentage of NewAF	0.538	0.462	1														Number of valid cases	275
				Percentage of Dataset	0.025	0.051	0.033		7(2.5)	6(5.1)	13(3.3)										a 0 cells (0.0%) have an expected count less than 5. The minimum expected count is 17.45.
				Percentage of Total	0.018	0.015	0.033
		Total		Count	275	117	392														Crosstab
				Percentage of NewAF	0.702	0.298	1																	Group		Total
				Percentage of Dataset	1	1	1																	0	1
				Percentage of Total	0.702	0.298	1														CHF	0	Count	211	52	263
		Chi-square test																					Percentage of CHF	0.802	0.198	1
			Value	Degree of freedom	Asymptotic significance (two-tailed)	Exact significance (two-tailed)	Exact significance (one-tailed)																Percentage for Group	0.981	0.867	0.956		211(98.1)	52(86.7)	263(95.6)
		Pearson's chi-squared test	1.708a	1	0.191																		Percentage of Total	0.767	0.189	0.956
		Continuity correction b	0.997	1	0.318																	1	Count	4	8	12
		Likelihood ratio	1.584	1	0.208																		Percentage of CHF	0.333	0.667	1
		Fisher exact test				0.22	0.158																Percentage for Group	0.019	0.133	0.044		4(1.9)	8(13.3)	12(4.4)
		Linear association	1.703	1	0.192																		Percentage of Total	0.015	0.029	0.044
		Crosstab																			Chi-square test
					Dataset		Total															Value	Degree of freedom	Asymptotic significance (two-tailed)	Exact significance (two-tailed)	Exact significance (one-tailed)
					1	2															Pearson's chi-squared test	14.795a	1	0
		DM	0	Count	190	74	264														Continuity correction b	12.174	1	0
				Percentage of DM	0.72	0.28	1														Likelihood ratio	11.713	1	0.001
				Percentage of Dataset	0.691	0.632	0.673		190(69.1)	74(63.2)	264(67.3)										Fisher exact test				0.001	0.001
				Percentage of Total	0.485	0.189	0.673														Linear association	14.742	1	0
			1	Count	85	43	128														Number of valid cases	275
				Percentage of DM	0.664	0.336	1														a 1 cell (25.0%) has an expected count less than 5. The minimum expected count is 2.62.
				Percentage of Dataset	0.309	0.368	0.327		85(30.9)	43(36.8)	128(32.7)
				Percentage of Total	0.217	0.11	0.327
		Total		Count	275	117	392														Crosstab
				Percentage of DM	0.702	0.298	1																	Group		Total
				Percentage of Dataset	1	1	1																	0	1
				Percentage of Total	0.702	0.298	1														PreStrokeHistory	0	Count	163	49	212
																							Percentage of PreStrokeHistory	0.769	0.231	1
																							Percentage for Group	0.758	0.817	0.771		163(75.8)	49(81.7)	212(77.1)
																							Percentage of Total	0.593	0.178	0.771
		Chi-square test																				1	Count	52	11	63
			Value	Degree of freedom	Asymptotic significance (two-tailed)	Exact significance (two-tailed)	Exact significance (one-tailed)																Percentage of PreStrokeHistory	0.825	0.175	1
		Pearson's chi-squared test	1.274a	1	0.259																		Percentage for Group	0.242	0.183	0.229		52(24.2)	11(18.3)	63(22.9)
		Continuity correction b	1.022	1	0.312																		Percentage of Total	0.189	0.04	0.229
		Likelihood ratio	1.26	1	0.262																Total		Count	215	60	275
		Fisher exact test				0.29	0.156
		Linear association	1.271	1	0.26
		Number of valid cases	392																		Chi-square test
		a 0 cells (0.0%) have an expected count less than 5. The minimum expected count is 38.20.																				Value	Degree of freedom	Asymptotic significance (two-tailed)	Exact significance (two-tailed)	Exact significance (one-tailed)
		b calculated for 2x2 tables only																			Pearson's chi-squared test	.910a	1	0.34
		Crosstab																			Continuity correction b	0.609	1	0.435
					Dataset		Total														Likelihood ratio	0.945	1	0.331
					1	2															Fisher exact test				0.389	0.22
		HL	0	Count	195	71	266														Linear association	0.907	1	0.341
				Percentage of HL	0.733	0.267	1														Number of valid cases	275
				Percentage of Dataset	0.709	0.607	0.679		195(70.9)	71(60.7)	266(67.9)										a 0 cells (0.0%) have an expected count less than 5. The minimum expected count is 13.75.
				Percentage of Total	0.497	0.181	0.679
			1	Count	80	46	126														Crosstab
				Percentage of HL	0.635	0.365	1																	Group		Total
				Percentage of Dataset	0.291	0.393	0.321		80(29.1)	46(39.3)	126(32.1)													0	1
				Percentage of Total	0.204	0.117	0.321														CHDHistory	0	Count	215	59	274
		Total		Count	275	117	392																Percentage of CHDHistory	0.785	0.215	1
				Percentage of HL	0.702	0.298	1																Percentage for Group	1	0.983	0.996		215(100)	59(98.3)	274(99.6)
				Percentage of Dataset	1	1	1																Percentage of Total	0.782	0.215	0.996
				Percentage of Total	0.702	0.298	1															1	Count	0	1	1
																							Percentage of CHDHistory	0	1	1
																							Percentage for Group	0	0.017	0.004		0(0)	1(1.7)	1(0.4)
		Chi-square test																					Percentage of Total	0	0.004	0.004
			Value	Degree of freedom	Asymptotic significance (two-tailed)	Exact significance (two-tailed)	Exact significance (one-tailed)														Total		Count	215	60	275
		Pearson's chi-squared test	3.935a	1	0.047
		Continuity correction b	3.48	1	0.062
		Likelihood ratio	3.863	1	0.049																Chi-square test
		Fisher exact test				0.058	0.032															Value	Degree of freedom	Asymptotic significance (two-tailed)	Exact significance (two-tailed)	Exact significance (one-tailed)
		Linear association	3.925	1	0.048																Pearson's chi-squared test	3.596a	1	0.058
		Number of valid cases	392																		Continuity correction b	0.467	1	0.494
		a 0 cells (0.0%) have an expected count less than 5. The minimum expected count is 37.61.																			Likelihood ratio	3.058	1	0.08
		b calculated for 2x2 tables only																			Fisher exact test				0.218	0.218
																					Linear association	3.583	1	0.058
		Crosstab																			Number of valid cases	275
					Dataset		Total
					1	2
		CHD	0	Count	195	102	297														Crosstab
				Percentage of CHD	0.657	0.343	1																	Group		Total
				Percentage of Dataset	0.709	0.872	0.758		195(70.9)	102(87.2)	297(75.8)													0	1
				Percentage of Total	0.497	0.26	0.758														Complication	0	Count	203	52	255
			1	Count	80	15	95																Percentage of Complication	0.796	0.204	1
				Percentage of CHD	0.842	0.158	1																Percentage for Group	0.944	0.867	0.927		203(94.4)	52(86.7)	255(92.7)
				Percentage of Dataset	0.291	0.128	0.242		80(29.1)	15(12.8)	95(24.2)												Percentage of Total	0.738	0.189	0.927
				Percentage of Total	0.204	0.038	0.242															1	Count	12	8	20
		Total		Count	275	117	392																Percentage of Complication	0.6	0.4	1
																							Percentage for Group	0.056	0.133	0.073		12(5.6)	8(13.3)	20(7.3)
		Chi-square test																					Percentage of Total	0.044	0.029	0.073
			Value	Degree of freedom	Asymptotic significance (two-tailed)	Exact significance (two-tailed)	Exact significance (one-tailed)														Total		Count	215	60	275
		Pearson's chi-squared test	11.834a	1	0.001
		Continuity correction b	10.964	1	0.001
		Likelihood ratio	12.913	1	0																Chi-square test
		Fisher exact test				0	0															Value	Degree of freedom	Asymptotic significance (two-tailed)	Exact significance (two-tailed)	Exact significance (one-tailed)
		Linear association	11.804	1	0.001																Pearson's chi-squared test	4.180a	1	0.041
		Number of valid cases	392																		Continuity correction b	3.11	1	0.078
		a 0 cells (0.0%) have an expected count less than 5. The minimum expected count is 28.35.																			Likelihood ratio	3.655	1	0.056
		b calculated for 2x2 tables only																			Fisher exact test				0.051	0.045
																					Linear association	4.165	1	0.041
		Crosstab																			Number of valid cases	275
					Dataset		Total
					1	2															Crosstab
		CHF	0	Count	263	116	379																	Group		Total
				Percentage of CHF	0.694	0.306	1																	0	1
				Percentage of Dataset	0.956	0.991	0.967		263(95.6)	116(99.1)	379(96.7)										InfarctionSite	1	Count	143	52	195
				Percentage of Total	0.671	0.296	0.967																Percentage of InfarctionSite	0.733	0.267	1
			1	Count	12	1	13																Percentage for Group	0.665	0.867	0.709		143(66.5)	52(86.7)	195(70.9)
				Percentage of CHF	0.923	0.077	1																Percentage of Total	0.52	0.189	0.709
				Percentage of Dataset	0.044	0.009	0.033		12(4.4)	1(0.9)	13(3.3)											2	Count	68	6	74
				Percentage of Total	0.031	0.003	0.033																Percentage of InfarctionSite	0.919	0.081	1
		Total		Count	275	117	392																Percentage for Group	0.316	0.1	0.269		68(31.6)	6(10)	74(26.9)
				Percentage of CHF	0.702	0.298	1																Percentage of Total	0.247	0.022	0.269
				Percentage of Dataset	1	1	1															3	Count	4	2	6
																							Percentage of InfarctionSite	0.667	0.333	1
		Chi-square test																					Percentage for Group	0.019	0.033	0.022		4(1.9)	2(3.3)	6(2.2)
			Value	Degree of freedom	Asymptotic significance (two-tailed)	Exact significance (two-tailed)	Exact significance (one-tailed)																Percentage of Total	0.015	0.007	0.022
		Pearson's chi-squared test	3.152a	1	0.076																Total		Count	215	60	275
		Continuity correction b	2.153	1	0.142
		Likelihood ratio	3.979	1	0.046
																					Chi-square test
		Crosstab																				Value	Degree of freedom	Asymptotic significance (two-tailed)
					Dataset		Total														Pearson's chi-squared test	11.308a	2	0.004
					1	2															Likelihood ratio	13.076	2	0.001
		PreStrokeHistory	0	Count	212	107	319														Linear association	6.309	1	0.012
				Percentage of PreStrokeHistory	0.665	0.335	1														Number of valid cases	275
				Percentage of Dataset	0.771	0.915	0.814		212(77.1)	107(91.5)	319(81.4)
				Percentage of Total	0.541	0.273	0.814
			1	Count	63	10	73
				Percentage of PreStrokeHistory	0.863	0.137	1
				Percentage of Dataset	0.229	0.085	0.186		63(22.9)	10(8.5)	73(18.6)
				Percentage of Total	0.161	0.026	0.186
		Total		Count	275	117	392
				Percentage of PreStrokeHistory	0.702	0.298	1
				Percentage of Dataset	1	1	1
				Percentage of Total	0.702	0.298	1
		Chi-square test
			Value	Degree of freedom	Asymptotic significance (two-tailed)	Exact significance (two-tailed)	Exact significance (one-tailed)
		Pearson's chi-squared test	11.172a	1	0.001
		Continuity correction b	10.244	1	0.001
		Likelihood ratio	12.562	1	0
		Fisher exact test				0.001	0
		Linear association	11.143	1	0.001
		Number of valid cases	392
		a 0 cells (0.0%) have an expected count less than 5. The minimum expected count is 21.79.
		b calculated for 2x2 tables only
		Crosstab
					Dataset		Total
					1	2
		CHDHistory	0	Count	274	117	391														Groupstatistics
				Percentage of CHDHistory	0.701	0.299	1															Group	Number of cases	Mean	Standard deviation	Mean standard error
				Percentage of Dataset	0.996	1	0.997		274(99.6)	117(100)	391(99.7)										Ages	0	215	70.24	7.928	0.541		70.24±7.93	76.7±8.22
				Percentage of Total	0.699	0.298	0.997															1	60	76.7	8.222	1.061
			1	Count	1	0	1														BMI	0	215	24.5724	2.89717	0.197585		24.57±2.9	24.28±3.16
				Percentage of CHDHistory	1	0	1															1	60	24.2839	3.16346	0.408401
				Percentage of Dataset	0.004	0	0.003		1(0.4)	0(0)	1(0.3)										OnsetTime	0	215	161.44	55.352	3.775		161.44±55.35	150.92±60.68
				Percentage of Total	0.003	0	0.003															1	60	150.92	60.678	7.833
		Total		Count	275	117	392														BNIHSS	0	215	4.96	3.191	0.218		4.96±3.19	15.08±5.81
				Percentage of CHDHistory	0.702	0.298	1															1	60	15.08	5.809	0.75
				Percentage of Dataset	1	1	1														PreSBP	0	215	150.16	14.8	1.009		150.16±14.8	154.9±14.72
				Percentage of Total	0.702	0.298	1															1	60	154.9	14.716	1.9
																					PreDBP	0	215	82.41	9.95	0.679		82.41±9.95	84.07±11.52
		Chi-square test																				1	60	84.07	11.523	1.488
			Value	Degree of freedom	Asymptotic significance (two-tailed)	Exact significance (two-tailed)	Exact significance (one-tailed)														Hb	0	215	135.38	15.546	1.06		135.38±15.55	135.33±16.16
		Pearson's chi-squared test	.427a	1	0.514																	1	60	135.33	16.159	2.086
		Continuity correction b	0	1	1																RBC	0	215	4.401	0.50509	0.03445		4.4±0.51	4.44±0.56
		Likelihood ratio	0.71	1	0.399																	1	60	4.4385	0.556	0.07178
		Fisher exact test				1	0.702														WBC	0	215	6.6691	2.11619	0.14432		6.67±2.12	7.97±2.69
		Linear association	0.425	1	0.514																	1	60	7.9703	2.68846	0.34708
		Number of valid cases	392																		N	0	215	64.475	9.3566	0.6381		64.48±9.36	73.74±11.02
		a 2 cells (50.0%) have expected counts less than 5. The minimum expected count is .30.																				1	60	73.742	11.0234	1.4231
		b calculated for 2x2 tables only																			PLT	0	215	207.51	57.586	3.927		207.51±57.59	212.13±64.48
																						1	60	212.13	64.483	8.325
		Crosstab																			K	0	215	3.9239	0.3753	0.0256		3.92±0.38	3.82±0.39
					Dataset		Total															1	60	3.8238	0.3891	0.05023
					1	2															Na	0	215	141.834	2.9188	0.1991		141.83±2.92	140.64±3.92
		Complication	0	Count	255	113	368															1	60	140.637	3.9239	0.5066
				Percentage of Complication	0.693	0.307	1														UN	0	215	5.4076	1.68054	0.11461		5.41±1.68	5.99±2.24
				Percentage of Dataset	0.927	0.966	0.939		255(92.7)	113(96.6)	368(93.9)											1	60	5.9892	2.23897	0.28905
				Percentage of Total	0.651	0.288	0.939														Cr	0	215	75.702	23.2852	1.588		75.7±23.29	74.95±24.67
			1	Count	20	4	24															1	60	74.95	24.6717	3.1851
				Percentage of Complication	0.833	0.167	1														PT	0	215	12.9665	0.8236	0.05617
				Percentage of Dataset	0.073	0.034	0.061		20(7.3)	4(3.4)	24(6.1)
				Percentage of Total	0.051	0.01	0.061														Independent sample test
		Total		Count	275	117	392																Levene’s test for variance equality		t test for mean equality of variances
				Percentage of Complication	0.702	0.298	1																F	Significance	t	Degree of freedom	Sig.（twi-tailed）	Mean difference	Standard error difference	95% confidence interval of difference
				Percentage of Dataset	1	1	1																							Lower limit	Upper limit
				Percentage of Total	0.702	0.298	1														Ages	Assumption of equal variances	0.057	0.811	-5.534	273	0	-6.458	1.167	-8.755	-4.161
																						No assumption of equal variances			-5.421	91.88	0	-6.458	1.191	-8.824	-4.092
																					BMI	Assumption of equal variances	0.925	0.337	0.668	273	0.504	0.288568	0.431704	-0.561325	1.13846
		Chi-square test																				No assumption of equal variances			0.636	88.515	0.526	0.288568	0.453687	-0.612966	1.1901
			Value	Degree of freedom	Asymptotic significance (two-tailed)	Exact significance (two-tailed)	Exact significance (one-tailed)														OnsetTime	Assumption of equal variances	1.011	0.316	1.275	273	0.203	10.525	8.256	-5.728	26.779
		Pearson's chi-squared test	2.121a	1	0.145																	No assumption of equal variances			1.21	88.272	0.229	10.525	8.696	-6.755	27.805
		Continuity correction b	1.504	1	0.22																BNIHSS	Assumption of equal variances	42.319	0	-17.745	273	0	-10.125	0.571	-11.248	-9.002
		Likelihood ratio	2.355	1	0.125																	No assumption of equal variances			-12.968	69.22	0	-10.125	0.781	-11.683	-8.568
		Fisher exact test				0.172	0.107														PreSBP	Assumption of equal variances	0.009	0.923	-2.195	273	0.029	-4.737	2.158	-8.986	-0.488
		Linear association	2.116	1	0.146																	No assumption of equal variances			-2.202	94.921	0.03	-4.737	2.151	-9.008	-0.466
		Number of valid cases	392																		PreDBP	Assumption of equal variances	3.957	0.048	-1.101	273	0.272	-1.657	1.505	-4.621	1.306
		a 0 cells (0.0%) have an expected count less than 5. The minimum expected count is 7.16.																				No assumption of equal variances			-1.014	85.092	0.314	-1.657	1.635	-4.908	1.593
																					Hb	Assumption of equal variances	0.027	0.87	0.019	273	0.985	0.043	2.289	-4.464	4.551
																						No assumption of equal variances			0.019	91.729	0.985	0.043	2.34	-4.604	4.691
		Crosstab																			RBC	Assumption of equal variances	0.987	0.321	-0.498	273	0.619	-0.03752	0.07542	-0.18599	0.11095
					Dataset		Total															No assumption of equal variances			-0.471	88.018	0.639	-0.03752	0.07962	-0.19575	0.1207
					1	2															WBC	Assumption of equal variances	4.433	0.036	-3.957	273	0	-1.30126	0.32884	-1.94864	-0.65388
		InfarctionSite	1	Count	195	81	276															No assumption of equal variances			-3.462	80.503	0.001	-1.30126	0.37589	-2.04924	-0.55329
				Percentage of InfarctionSite	0.707	0.293	1														N	Assumption of equal variances	3.46	0.064	-6.515	273	0	-9.2663	1.4222	-12.0663	-6.4664
				Percentage of Dataset	0.709	0.692	0.704		195(70.9)	81(69.2)	276(70.4)											No assumption of equal variances			-5.941	84.172	0	-9.2663	1.5596	-12.3677	-6.1649
				Percentage of Total	0.497	0.207	0.704														PLT	Assumption of equal variances	0.066	0.798	-0.535	273	0.593	-4.622	8.635	-21.622	12.379
			2	Count	74	36	110															No assumption of equal variances			-0.502	86.997	0.617	-4.622	9.205	-22.917	13.673
				Percentage of InfarctionSite	0.673	0.327	1														K	Assumption of equal variances	0.656	0.419	1.811	273	0.071	0.10003	0.05524	-0.00872	0.20877
				Percentage of Dataset	0.269	0.308	0.281		74(26.9)	36(30.8)	110(28.1)											No assumption of equal variances			1.774	91.904	0.079	0.10003	0.05638	-0.01195	0.212
				Percentage of Total	0.189	0.092	0.281														Na	Assumption of equal variances	4.216	0.041	2.593	273	0.01	1.1978	0.4618	0.2885	2.107
			3	Count	6	0	6															No assumption of equal variances			2.201	78.115	0.031	1.1978	0.5443	0.1142	2.2813
				Percentage of InfarctionSite	1	0	1														UN	Assumption of equal variances	6.693	0.01	-2.193	273	0.029	-0.58154	0.26512	-1.10348	-0.05959
				Percentage of Dataset	0.022	0	0.015		6(2.2)	0(0)	6(1.5)											No assumption of equal variances			-1.87	78.476	0.065	-0.58154	0.31094	-1.20052	0.03744
				Percentage of Total	0.015	0	0.015														Cr	Assumption of equal variances	0.257	0.612	0.218	273	0.827	0.7523	3.4445	-6.0289	7.5336
		Total		Count	275	117	392															No assumption of equal variances			0.211	90.438	0.833	0.7523	3.559	-6.3179	7.8225
				Percentage of InfarctionSite	0.702	0.298	1														PT	Assumption of equal variances	0.337	0.562	-1.528	273	0.128	-0.18182	0.11897	-0.41604	0.0524
				Percentage of Dataset	1	1	1															No assumption of equal variances			-1.573	98.542	0.119	-0.18182	0.11557	-0.41114	0.0475
				Percentage of Total	0.702	0.298	1														APTT	Assumption of equal variances	1.289	0.257	1.236	273	0.218	0.6177	0.4998	-0.3663	1.6017
																						No assumption of equal variances			1.317	103.912	0.191	0.6177	0.4692	-0.3127	1.5481
		Chi-square test																			INR	Assumption of equal variances	0.116	0.733	-1.127	273	0.261	-0.01275	0.01131	-0.03502	0.00952
			Value	Degree of freedom	Asymptotic significance (two-tailed)																	No assumption of equal variances			-1.119	93.52	0.266	-0.01275	0.0114	-0.03538	0.00988
		Pearson's chi-squared test	3.021a	2	0.221																Fg	Assumption of equal variances	17.294	0	-4.284	273	0	-0.5886	0.13739	-0.85908	-0.31813
		Likelihood ratio	4.715	2	0.095																	No assumption of equal variances			-3.147	69.461	0.002	-0.5886	0.18705	-0.96172	-0.21549
		Linear association	0.008	1	0.927																24hNIHSS	Assumption of equal variances	98.817	0	-27.003	273	0	-12.022	0.445	-12.899	-11.146
		Number of valid cases	392																			No assumption of equal variances			-17.465	64.356	0	-12.022	0.688	-13.397	-10.647
		a 2 cells (33.3%) have expected counts less than 5. The minimum expected count is 1.79.
		Crosstab
					Dataset		Total
					1	2
		3mMRS	0	Count	131	66	197
				Percentage of 3mMRS	0.665	0.335	1
				Percentage of Dataset	0.476	0.564	0.503		131(47.6)	66(56.4)	197(50.3)
				Percentage of Total	0.334	0.168	0.503
			1	Count	60	18	78
				Percentage of 3mMRS	0.769	0.231	1
				Percentage of Dataset	0.218	0.154	0.199		60(21.8)	18(15.4)	78(19.9)
				Percentage of Total	0.153	0.046	0.199
			2	Count	24	16	40
				Percentage of 3mMRS	0.6	0.4	1
				Percentage of Dataset	0.087	0.137	0.102		24(8.7)	16(13.7)	40(10.2)
				Percentage of Total	0.061	0.041	0.102
			3	Count	29	12	41
				Percentage of 3mMRS	0.707	0.293	1
				Percentage of Dataset	0.105	0.103	0.105		29(10.5)	12(10.3)	41(10.5)
				Percentage of Total	0.074	0.031	0.105
			4	Count	14	3	17
				Percentage of 3mMRS	0.824	0.176	1
				Percentage of Dataset	0.051	0.026	0.043		14(5.1)	3(2.6)	17(4.3)
				Percentage of Total	0.036	0.008	0.043
			5	Count	4	0	4
				Percentage of 3mMRS	1	0	1
				Percentage of Dataset	0.015	0	0.01		4(1.5)	0(0)	4(1)
				Percentage of Total	0.01	0	0.01
			6	Count	13	2	15
				Percentage of 3mMRS	0.867	0.133	1
				Percentage of Dataset	0.047	0.017	0.038		13(4.7)	2(1.7)	15(3.8)
				Percentage of Total	0.033	0.005	0.038
		Total		Count	275	117	392
				Percentage of 3mMRS	0.702	0.298	1
				Percentage of Dataset	1	1	1
				Percentage of Total	0.702	0.298	1
		Chi-square test
			Value	Degree of freedom	Asymptotic significance (two-tailed)
		Pearson's chi-squared test	9.804a	6	0.133
		Likelihood ratio	11.341	6	0.078
		Linear association	3.537	1	0.06
		Number of valid cases	392
		a 3 cells (21.4%) have expected counts less than 5. The minimum expected count is 1.19.
		Group * Dataset Crosstab
					Dataset		Total
					1	2
		Group	0	Count	215	100	315
				Percentage for Group	0.683	0.317	1
				Percentage of Dataset	0.782	0.855	0.804		215(78.2)	100(85.5)	315(80.4)
				Percentage of Total	0.548	0.255	0.804
			1	Count	60	17	77
				Percentage for Group	0.779	0.221	1
				Percentage of Dataset	0.218	0.145	0.196		60(21.8)	17(14.5)	77(19.6)
				Percentage of Total	0.153	0.043	0.196
		Total		Count	275	117	392
				Percentage for Group	0.702	0.298	1
				Percentage of Dataset	1	1	1
				Percentage of Total	0.702	0.298	1
		Groupstatistics
			Dataset	Number of cases	Mean	Standard deviation	Mean standard error
		24hNIHSS	1	275	5.45	5.832	0.352
			2	117	4.47	4.448	0.411
	Independent sample test
			Levene’s test for variance equality		t test for mean equality of variances
			F	Significance	t	Degree of freedom	Sig.（two-tailed）	Mean difference	Standard error difference
	24hNIHSS	Assumption of equal variances	7.284	0.007	1.628	390	0.104	0.981	0.602
		No assumption of equal variances			1.813	283.503	0.071	0.981	0.541
